# Supplementary material
Source: publisher figshare collection journal article supplement (https://acs.figshare.com/ndownloader/files/9198430)
Supplement: Supplementary file 1 [file 9198430]

## Supporting Information for

# The electronic structure of transition-metal based $\text{Cu}_2\text{GeTe}_3$ phase change material: Revealing the key role of Cu *d* electrons

Yuta Saito<sup>1\*</sup>, Yuji Sutou<sup>2\*\*</sup>, Paul Fons<sup>1</sup>, Satoshi Shindo<sup>2</sup>, Xeniya Kozina<sup>3</sup>, Jonathan M. Skelton<sup>4</sup>, Alexander V. Kolobov<sup>1</sup> and Keisuke Kobayashi<sup>5</sup>

<sup>1</sup> Nanoelectronics Research Institute, National Institute of Advanced Industrial Science and Technology (AIST), Tsukuba Central 5, 1-1-1 Higashi, Tsukuba 305-8565, Japan

<sup>2</sup> Department of Materials Science, Graduate School of Engineering, Tohoku University, 6-6-11, Aoba-yama, Aoba-ku, Sendai 980-8579, Japan

<sup>3</sup> Helmholtz - Zentrum Berlin für Materialien und Energie GmbH, 15 Albert - Einstein - Straße, Berlin 12489, Germany

<sup>4</sup> Department of Chemistry, University of Bath, Claverton Down, Bath BA2 7AY, UK

<sup>5</sup> SPring-8/JASRI, Kouto 1-1-1, Sayo-cho, Sayo-gun, Hyogo 679-5198, Japan

\* yuta-saito@aist.go.jp, \*\* ysutou@material.tohoku.ac.jp

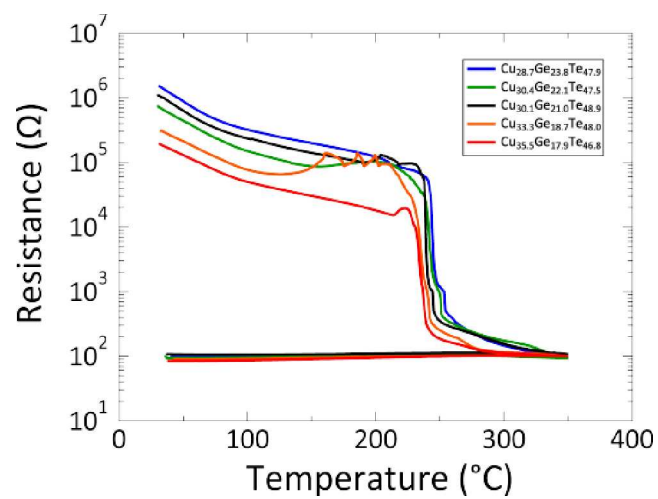

Figure S1. Temperature dependence of the electrical resistance of Cu-Ge-Te films measured by the two-point probe method.

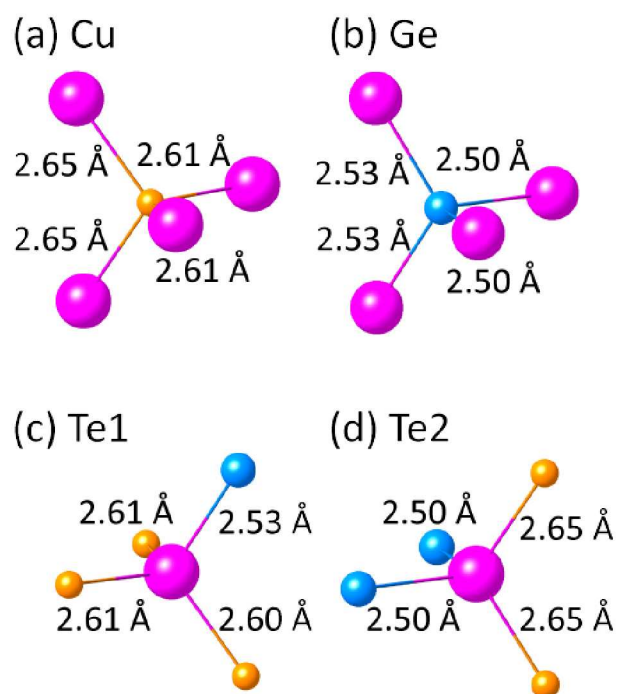

Figure S2. The four types of tetrahedral bonding in crystalline  $\text{Cu}_2\text{GeTe}_3$ , with bond lengths as marked (Cu - yellow, Ge - blue, Te - pink).

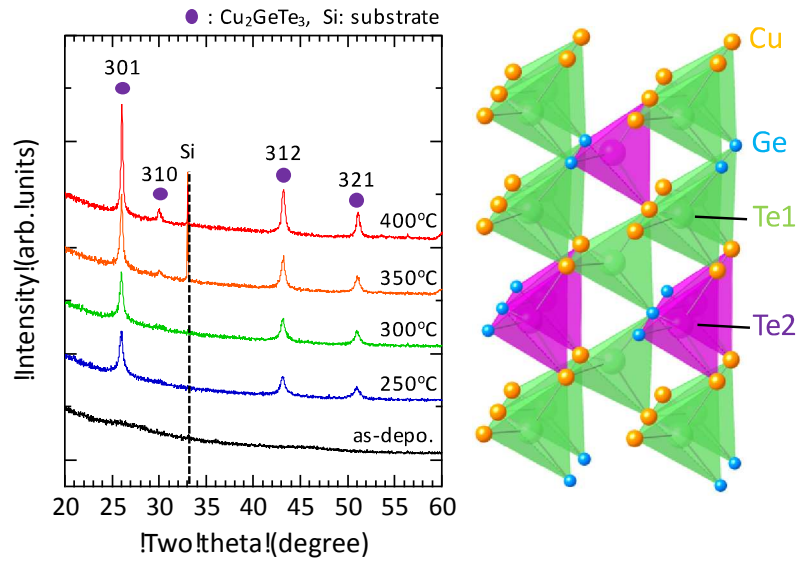

Figure S3. XRD patterns of the  $\text{Cu}_2\text{GeTe}_3$  after annealing at different temperatures (left panel). All peaks were assigned to  $\text{Cu}_2\text{GeTe}_3$  phase without any unknown peaks except for the Si substrate peak. The crystal structure of  $\text{Cu}_2\text{GeTe}_3$  in the (polyhedron) tetrahedron representation (right panel).

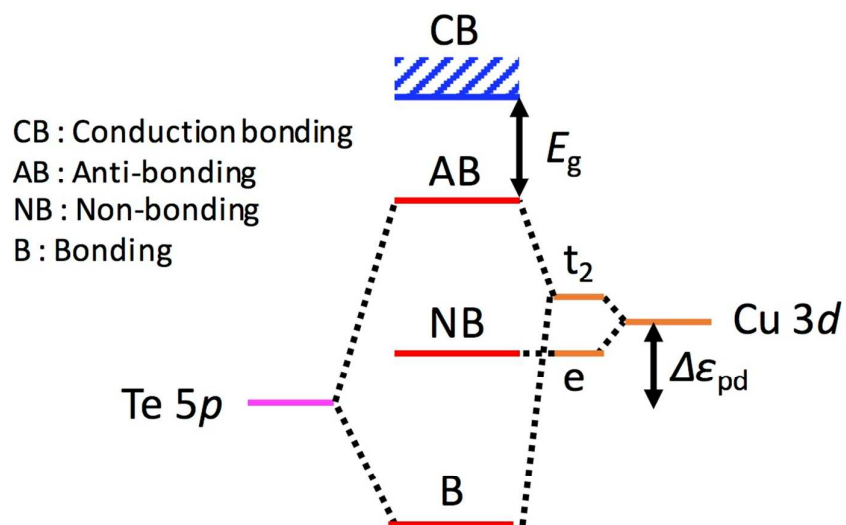

Figure S4. Schematic plot of  $p$ - $d$  interaction [52]. In Figure 4, (A), (B), and (C) are assigned to AB, NB, B states in this Figure.
